# Supplementary material for: Re-Assessment of Applicability of Greulich and Pyle-Based Bone Age to Korean Children Using Manual and Deep Learning-Based Automated Method
Source: PubMed Central journal article supplement — Yonsei Med J. 2022 Jun 14;63(7):683–91. doi: 10.3349/ymj.2022.63.7.683 (PMC9226834; doi:10.3349/ymj.2022.63.7.683), 2022-06-14
Supplement: ymj-63-683-s003.pdf [file ymj-63-683-s003.pdf]

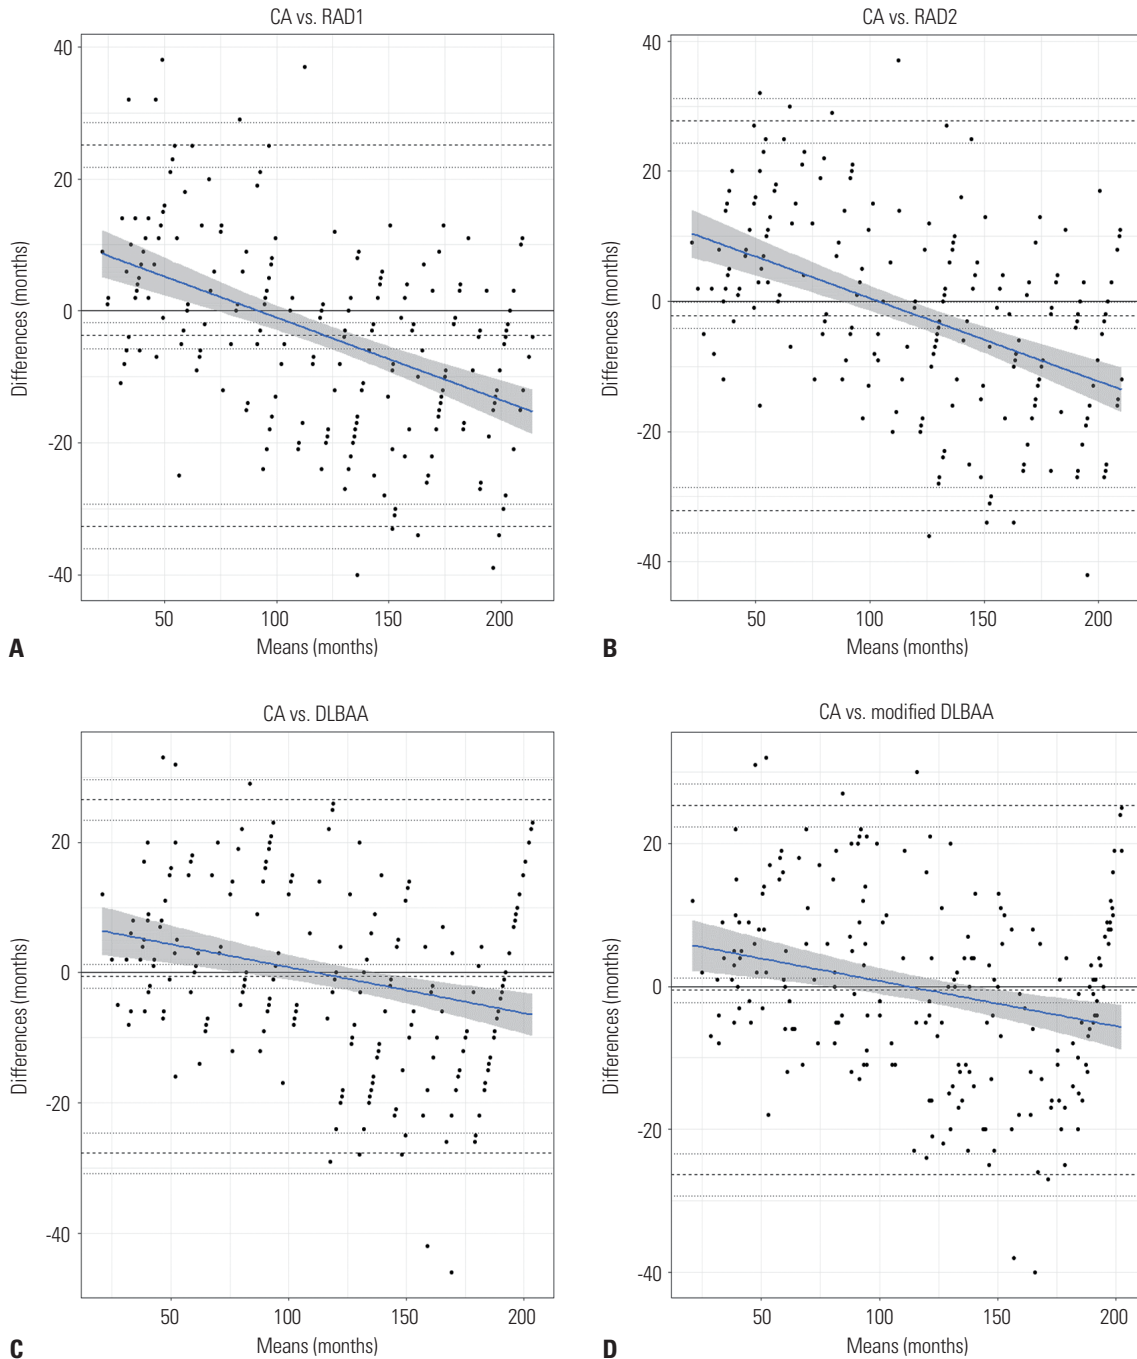

**Supplementary Fig. 2.** Bland-Altman plots and trend curve for comparison between chronological age (CA) and estimated bone age by radiologist 1 (A), radiologist 2 (B), original model of deep learning-based bone age assessment (DLBAA) system (C), and modified model of DLBAA system (D) in girls. Limits of agreement are shown as the top and bottom dashed lines and average bias (the center dashed line) with 95% confidence intervals of each value (dotted line). The regression fit of the differences on the means are shown as solid blue lines with 95% confidence intervals (gray shaded area).
